# Supplementary material
Source: PubMed Central journal article supplement (PMC4836221)
Supplement: MCB.01004-15_zmb999101210so3.pdf [file MCB.01004-15_zmb999101210so3.pdf]

### Supplementary Table

|                                       |                                             |
|---------------------------------------|---------------------------------------------|
|                                       |                                             |
| <b>1. Full length KIBRA primers:</b>  |                                             |
| Forward primer:                       | 5'- GCTAGCCGCACCACCAGCTGGATC -3'            |
| Reverse primer:                       | 5'-pGGCGGCCGCTTAGACGTCATCTGCAGA             |
| <b>2.KIBRA - mCherry:</b>             |                                             |
| LIC vKoz Forward tag                  | 5'-TACTTCCAATCCAATGCCACCATGCCCCGGCCGGA -3'  |
| LIC vGFP Reverse tag                  | 5'-CTCCCACTACCAATGCCGACGTCATCTGCAGA -3'     |
| <b>3. SnaB1- KIBRA- mCherry:</b>      |                                             |
| Forward primer:                       | 5'-TACGTACGCACCACCAGCTG -3'                 |
| Reverse primer:                       | 5'-TACGTACTTGTACAGCTCGTCCATGCCGCCGGTG-3'    |
| <b>4. KIBRA – T1003 A SDM primer:</b> |                                             |
| Forward primer:                       | 5'-GGCACGCCCAATTGACCCAGGAGATCTC-3'          |
| Reverse primer:                       | 5'-CTCCTGGGTCAATTGGGCGTGCCAGGTTC-3'         |
| <b>5. KIBRA-T1006A SDM Primer:</b>    |                                             |
| Forward primer:                       | 5'-GCCAATTGGCCCAGGAGATCTCGGTGCTGAAG-3'      |
| Reverse primer:                       | 5'-CTCCTGGGCCAATTGGCTGTGCCAGGTTC-3'         |
| <b>6.KIBRA-T1006E SDM primer</b>      |                                             |
| Forward primer:                       | 5'-CCTGGCACAGCCAATTGGAGCAGGAGATCTCGGTGCT-3' |
| Reverse primer:                       | 5'-AGCACCGAGATCTCCTGCTCCAATTGGCTGTGCCAGG-3' |
| <b>7. Guide RNA sequence:</b>         |                                             |
| Guide 1                               |                                             |
| Forward primer:                       | 5'- CACCGGGCGCGCGACTTTCGACGGCAAGG-3'        |
| Reverse primer:                       | 3'- CCCGCGCGCTGAAGCTGCCGTTCCCAA-5'          |
| Guide 2                               |                                             |
| Forward primer:                       | 5'- CACCGGAGGAGGCGCGCGACTTTCGACGG-3'        |
| Reverse primer:                       | 3'-CCTCCTCCGCGCGCTGAAGCTGCCCAA-5'           |
| Guide 3                               |                                             |
| Forward primer:                       | 5'- CACCGTGATGAGTTGCCGCTAGGATGGG - 3'       |
| Reverse primer:                       | 3'-CACTACTCAACGGCGATCCTACCC CAAA-5'         |
|                                       |                                             |
